# Supplementary material
Source: Research Square preprint supplement (doi:10.21203/rs.3.rs-8996149/v1)
Supplement: Supplementary file 1 [file 7801babf8c8b06a806e5e7d7.docx]

## Supplementary File 2

## **SUPPLEMENTARY MATERIAL 2: INTERVIEW GUIDE**

### **Semi-Structured Interview Guide for Nurses Supporting Families During End-of-Life Decision-Making in ICU Settings**

**Study Title:** Walking Alongside Families: A Phenomenological Study of Nurses' Roles in Supporting End-of-Life Decision-Making in Intensive Care Units

**Interviewer:** Abdulaziz M. Alodhailah

**Interview Number:** _____ **Date:** _____ **Time:** _____ **Location:** _____

**Participant ID:** _____ **Duration:** _____ **Language:** □ Arabic □ English

### **Opening and Rapport Building (2–3 minutes)**

Thank you so much for taking time to meet with me today. I really appreciate your willingness to share your experiences. Before we begin, I want to remind you that this conversation is completely confidential. Everything you share will be anonymized, and your name will never appear in any publications or presentations. You're free to take breaks at any time, and you can decline to answer any question that makes you uncomfortable. There are no right or wrong answers—I'm interested in understanding your real experience.

Do you have any questions before we begin?

### **Domain 1: General Experience with Family Support (8–10 minutes)**

**Opening Question:**

1. **Tell me about your experience providing support to families during end-of-life decision-making in the ICU.** I'm interested in how you experience this part of your nursing practice. What comes to mind when you think about your work with families during these difficult times?

Probes:

- How long have you been involved in this kind of work?
- Can you describe a situation that stands out in your memory?
- What does family support mean to you in the context of end-of-life care?

1. **What is a typical situation you encounter?** Walk me through what happens when a patient in your ICU is approaching end-of-life and families are facing decisions about their care.

*Probes:*

- Who is involved in these situations?
- What are families typically worried or concerned about?
- How do you first become aware that a family needs support?

1. **How do you feel about this aspect of your work?** What emotions or reactions do you experience when you're supporting families through end-of-life decisions?

*Probes:*

- Has this changed over your career?
- Are there situations that affect you more than others?
- How do you carry this work with you?

**Domain 2: Support Strategies and Approaches (10–12 minutes)**

1. **What specific strategies do you use to support families during end-of-life decision-making?** Tell me about the things you do or say that help families navigate these difficult times.

*Probes:*

- How do you provide information to families?
- How do you help families understand medical information?
- How do you provide emotional support?
- What role do you play in family discussions?

1. **Can you give me an example of a time when you felt you provided really meaningful support to a family?** What happened? What did you do? What made it meaningful?

*Probes:*

- How did the family respond?
- What skills or abilities did you draw on?
- How did you feel afterward?

1. **How do you navigate conversations about patient wishes and values with families?** Tell me about how you help families understand and honor what the patient wants.

*Probes:*

- How do you ask about patient preferences?
- How do you help families connect patient values to current situations?
- What challenges do you encounter?

1. **Tell me about how you address the emotional and spiritual dimensions of end-of-life care.** How do you support families' emotional needs? How do you address spiritual or religious concerns?

*Probes:*

- What role does faith or spirituality play in end-of-life care in your context?
- How do you support families' spiritual practices?
- When do you feel equipped to address these dimensions? When do you feel ill-equipped?

**Domain 3: Facilitating and Hindering Factors (10–12 minutes)**

1. **What factors help you provide meaningful support to families?** What makes it possible for you to do this work well?

*Probes:*

- Organizational or institutional factors?
- Resources or support from colleagues or supervisors?
- Personal characteristics or skills?
- Relationships with interdisciplinary team members?
- Family or patient factors?
- Anything else?

1. **What barriers or challenges do you encounter in supporting families?** What makes this work difficult?

*Probes:*

- Staffing or workload issues?
- Lack of training or preparation?
- Organizational policies or culture?
- Lack of resources or services?
- Difficulty communicating with families?
- Conflicts with other team members?
- Personal or emotional challenges?

1. **Can you describe a situation where you wanted to provide more support but couldn't?** What prevented you? How did that feel?

*Probes:*

- What would have enabled you to provide the support you wanted to give?
- How did this situation affect you?
- Have similar situations happened before?

1. **Tell me about the role of your healthcare facility's policies, culture, and resources in your work with families.** How do the systems and structures you work within shape what you can accomplish?

*Probes:*

- How do institutional priorities affect your work?
- What palliative or end-of-life care infrastructure exists in your facility?
- How do organizational policies support or constrain your work?
- What resources are available or unavailable?

**Domain 4: Interactions with Families and Patients (8–10 minutes)**

1. **Tell me about your relationships with families you support through end-of-life decisions.** How do these relationships develop? What role do you play?

*Probes:*

- How much time do you typically spend with families?
- What do families tell you they need from nurses?
- How do families respond to your support?
- Are there cultural differences in how families respond?

1. **How do you handle situations where you disagree with family decisions or where families are making decisions you don't think are in the patient's best interest?** Walk me through how you navigate these situations.

*Probes:*

- What do you do or say?
- How do you balance your professional judgment with family autonomy?
- What support do you get from your team?

1. **How do you communicate with families when there is disagreement among the healthcare team?** Tell me about times when physicians, nurses, families, or other team members have different perspectives.

*Probes:*

- How do you position yourself?
- What do you advocate for?
- How do you maintain relationships with all parties?

**Domain 5: Impact on Self and Suggestions for Improvement (8–10 minutes)**

1. **How does this work affect you personally and professionally?** What does it cost you? What does it give you?

*Probes:*

- How do you manage the emotional demands?
- Have you experienced burnout or compassion fatigue?
- What keeps you engaged in this work?
- How has this work shaped you as a nurse?

1. **If you could change anything about how end-of-life decision-making and family support happens in your ICU, what would you change?** What improvements would you make?

*Probes:*

- What would enhance your capacity to support families?
- What systemic or organizational changes are needed?
- What changes in nursing preparation or training?
- What changes in professional relationships or collaboration?

1. **What advice would you give to newer nurses entering ICU practice?** What do you want them to know about supporting families during end-of-life decisions?

*Probes:*

- What skills or qualities are important?
- What should they expect emotionally?
- What resources or support should they seek?

**Closing Questions**

1. **Is there anything else you'd like to share about your experience that we haven't discussed?** Anything you think is important for me to understand?
2. **How was this interview for you?** Is there anything you'd like to add or clarify?

**Closing Statement**

Thank you so much for sharing your experiences so openly and thoughtfully. Your insights are invaluable for understanding how nurses support families during end-of-life transitions. If you have any questions or concerns after this interview, please don't hesitate to contact me. We'll be sharing findings with all participating facilities, and I'll make sure you have access to the final results. Again, I really appreciate your time and your contribution to this research.
